# Supplementary material
Source: publisher figshare collection journal article supplement (https://acs.figshare.com/ndownloader/files/4586509)

Figure S-1 The base peaks of fraction 2 of three replicates by pH continuous elution and pH step elution.

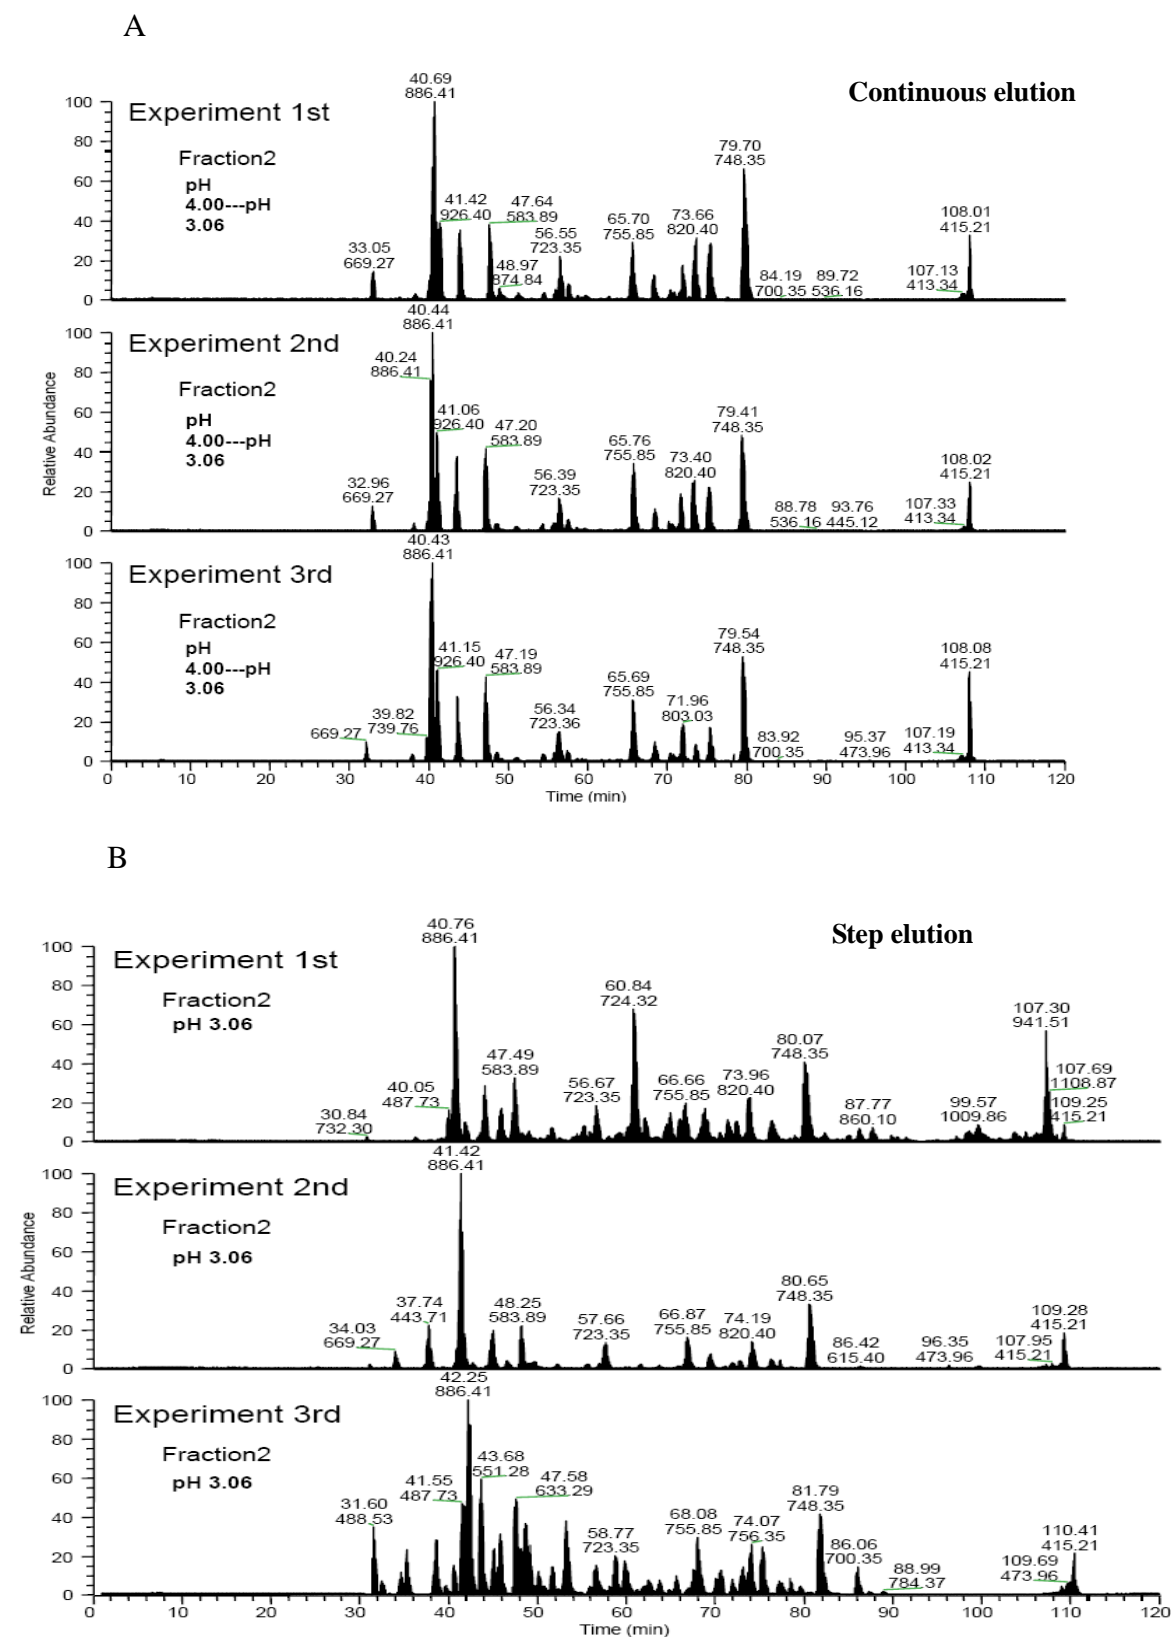

Supplement: Supplementary file 1 [file 4586509]
